# Novel determination on root-knot nematodes; microspace, mineral profile and transduction of metabolic signals in tomato

Víctor García-Gaytán<sup>1,\*</sup>, Esteban Sánchez-Rodríguez<sup>1</sup>, José J. Ordaz-Ortiz<sup>2</sup>, Josaphat M. Montero-Vargas<sup>2</sup>, Olimpia Alonso-Pérez<sup>1</sup>, Luis Rojas-Abarca<sup>1</sup>, Elena Gómez-Cabrera<sup>3</sup>, Juan L. Negrete-Guerrero<sup>3</sup>

<sup>1</sup>El Colegio de Michoacán, A.C. LADIPA, La Piedad, Cerro de Nahuatzen 85, Jardines del Cerro Grande, 59370, México.

<sup>2</sup>Cinvestav-Langebio, Irapuato, Libramiento Norte, Km. 9.6, Carretera Irapuato-León, Irapuato, Gto. 36821, México.

<sup>3</sup>Universidad Politécnica de Pénjamo, Carretera Irapuato - La Piedad Km 44, El Derramadero, Pénjamo Gto., C.P. 36921, México

## Abstract

Globally, nematodes are parasites that destroy many crops, however, their presence also serves as an indicator of the state of soil health. Tomato is a very studied, cultivated vegetable. In the micro-space of the knots we determine its pathogenesis. The macronutrients, micronutrients and beneficial elements present on root-knot nematodes were C>O> N (54.73, 37.57, and 3.55%), phosphorus (0.133%), Na>Ca>Mg>K cations (1.13, 1.032, 0.094, and 0.048%), S (0.247%), micronutrients Fe>Cl (0.163, 0.027%), and beneficial elements Si>Al (0.354, 0.985%). Progenesis of the chromatograms (ES+/ES-), 202 compounds were detected in the first polarity, in which 195 have at least one possible identification candidate, the second were 42 compounds, and 41 match with at least one compound. Putative compounds with the highest scores are reported in this research: kukoamina (57.6), furmecyclox (51.1), feruloylputrescina (55.3), N1-trans-feruloylagmatine (53.9), dehydrotomatine (49.8, 50.8, 52.3, 52.6), jurubine (54.8, 51.6), etnangien (50.2), dehydromelilotoside (41.5), tomatine (55), minutissamide (51.7). Nematodes in state (J2), six nematodes within the knots with an average length of 1.16 mm, were found and their interaction with other microorganisms is possible. With the high concentrations of Na<sup>+</sup> in the root, the concentration of the cation Mg<sup>2+</sup> and K<sup>+</sup> decreases; while the N does not present any change.

**Keywords:** Micro-space, roots, mineral profile, microbiota, soil health, metabolic profile, agronomy

## Introduction

For plants to express their maximum yield potential, proper management of root nutrition, stimulation and bioprotection is necessary (García-Gaytán *et al.*, 2018a), the plant genotype and an adequate nutrient solution (García-Gaytán *et al.*, 2018b), foliar nutrient applications (García-Gaytán *et al.*, 2013), and environmental monitoring (prevention of pests and diseases) (García-Gaytán *et al.*, 2016). Although, tomato cultivation is one of the most studied and cultivated in different growth conditions, it is also a vegetable of greater demand in national and international markets. These innovations and value added must be put in place for other crops, such as native species of great gastronomic recognition (García-Gaytán *et al.*, 2017).

The improvement in tomato yield is also due, thanks to hybrids developed in the mid-1980s (Grandillo *et al.*, 1999). An integrated control management makes a significant contribution to agricultural sustainability and environmental quality. Organic matter (OM) and practices that increase total microbial activity in the soil improves pathogen suppression by increasing competition for nutrients (Ghorbani *et al.*, 2009). Compost reduces disease development, due to the activity of consortia of antagonistic microorganisms (Hadar and Papadopolou, 2012). In addition, crop rotation increases bacterial populations, and soil microbial activity (Larking *et al.*, 2010). Root-knot nematodes (RKN) form a feeding site by inducing several individual cells to become giant cells (Hoth *et al.*, 2008). These parasitic nematodes destroy 12.3% of crop production annually, which translates to more than 157 billion dollars worldwide (Hassan *et al.*, 2013). While nematodes are active in the soil throughout the year, it therefore has the potential to provide a holistic measurement of the biotic and functional state of soils (Ritz and Trudgill, 1999). Studies of wave movements in Newtonian fluids (viscosity) of the *Caenorhabditis elegans* nematode have been carried out, the wave march continuously varies with changes in the external load, that is, as the load increases, the wavelength and frequency decrease wave (Fang-Yen *et al.*, 2010). Previously, it had been suggested that metabolic engineering in plants would allow a critical evaluation of the role of individual compounds in plant-rhizosphere communication

(Van Dam and Bouwmeester, 2016). The term microcosm has also been discussed to study the diversity of plants and their effect on the biomass of fungi and soil bacteria (Eisenhauer *et al.*, 2017), and explain the beneficial effects of the interaction of species of plants, and worms on nematodes (Niu *et al.*, 2019). This research, the term micro-space is addressed for the first time. We demonstrate the number of nematodes that can accommodate a knots (pathogenesis) and corroborates the wave movement in it. We also performed the analysis of macronutrients, micronutrients and beneficial elements on (RKN), metabolic compounds on (RKN). And the putative compounds with the highest score. To our knowledge, this is the first article worldwide that addresses the wave movement of the nematode in the microspace of the knots - elementary content - metabolomic profile (compounds of great agronomic relevance and for future research).

## Material and Methods

### *Biological material and micro-environment conditions*

Roots infested by nematodes (*Meloydogine* ssp.) in tomato plants (*Solanum* ssp.) were collected in a greenhouse in Guanajuato, Mexico. The conditions inside the greenhouse were; CO<sub>2</sub> concentration was 280 ppm, air temperature 88 °F and relative humidity (RH) of 49% (Temp/RH/CO<sub>2</sub>, Hand-Held Meter, Spectrum® Technologies, Inc.).

### *Scanning electron microscopy / energy dispersive X-ray spectrometry (SEM-EDS)*

#### *Scan pathogenesis: Micro-space over the knots*

Root-knot nematodes, the knots were deposited in 50 mL-1 falcon-type plastic tubes with distilled water. Root knots was removed and immersed in liquid nitrogen at -195.79 °C. A cross section was made to the tissue. With the use of a scanning electron microscopy/X-ray spectrometry of energy dispersion (SEM-EDS) micrographs of the nematodes were taken

into the gill and their dimensions were determined ( $\mu\text{m}$ ). The nematodes were also observed in a stereoscopic microscope (Leica, EZ4HD, 8-35x) Supplementary Fig. S1.

# *Elementary profile on (RKN)*

To identify the elementary composition and the relative distribution of the primary, secondary, micronutrient, and beneficial elements on RKN. The samples were processed according to the methodology of [García-Gaytán et al. \(2019\)](#). The determination of the elementary content was determined directly on the knots. The relative content was determined in a scanning electron microscope (Scanning Electron Microscope, Model 7582, England), the value of the elementary composition corresponds to the average of five repetitions in the tissue. They were plotted with GraphPad Prism 7.0 software (GraphPad Software, Inc., La Jolla, CA, USA).

# *LC-MS Q-TOF metabolomic profile on (RKN)*

The knots were deposited in two 50 mL<sup>-1</sup> falcon plastic tubes in the first tube containing FAA fixative solution (formaldehyde, alcohol, distilled water) in a second tube the gills contained HPLC water. The samples of each tube were processed with liquid nitrogen - 195.79 °C. The fine powders of the samples were deposited in eppendorf tubes each. The samples were subsequently centrifuged, to separate the supernatant from the tissue. With a miVac the extracts were dried and reconstituted with 250  $\mu\text{L}$  equal to the initial gradient of liquid chromatography. The extracts were run by LC-MS Q-TOF in both polarities for a m/z range of 50-1500.

# *Liquid chromatography*

An ACQUITY UPLC® HSS T3 1.8  $\mu\text{m}$  2.1 x 100 mm column was used for liquid chromatography. In mobile phase A, H<sub>2</sub>O:0.1% FA was used and for mobile phase B, 0.1%

FA ACN was used, with a flow rate of 0.4 mL/min. With six time gradients (min): initial, 0.50, 25, 26.50, 26.75 and 30 respectively. The injection volume was 10 µL, with a column temperature of 40 ° C.

### *Mass spectrometry (MS)*

For the MS, a Water Synapt G1 Q-TOF device was used, with polarity (ES+/ES-), capillary (kV) 3.0 and 2.6, sampling cone (V) 40.0, extraction cone (V) 4.0, source temperature (°C) 120, desolvation temperature (°C) 350, desolvation gas flow (L/h) 500, Scan time (s) 1.5, LM resolution 4.7, HM resolution 15, trap CE 6.0, transfer CE 4.0, source (mL/min) 0.0, trap (mL/min) 1.5, detector 1850 and 1750, multiplier 650, finally the autosampler temperature was 6 ° C.

## **Results**

### *Pathogenesis*

Root-knot nematodes were identified male nematodes in juvenile state within the knot. In fig. 2, it can be seen that the nematodes show wave mobility in the micro-spaces (communication galleries) within the knot (Fig. 2A). Cross section of the nematode within the knot micro-space, with wave mobility (Fig. 2B). We demonstrate, for the first time, that, in an infested gall, more than six nematodes can be housed (Fig. 2C). The nematodes have an elongated cylindrical shape with a length of 1.16 mm (Fig. 2D).

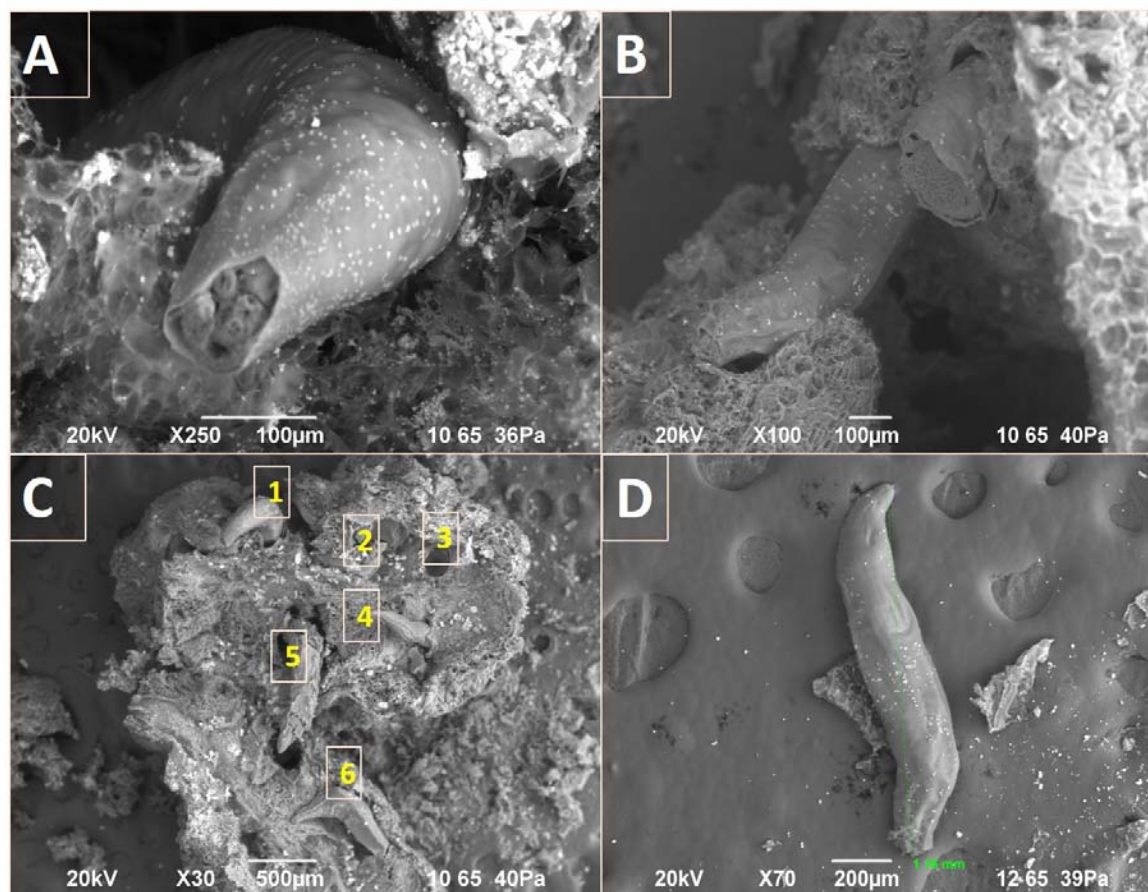

**Fig. 2.** Root-knot nematodes, a) juvenile state of the nematode within the gill, wave motion within the micro-space, b) wave-like locomotion of the nematode within the micro-space of the gill, c) population of juvenile nematodes within of the knot (micro-space), d) length of a male nematode.

## Perfil elemental del knot

### *Scanning electron microscopy/energy dispersive X-ray spectrometry (SEM-EDS)*

We also show the elementary profile of knot infested with nematodes (Fig. 3). The elements analyzed in this study were C, N, and O. The highest to lowest concentration was C> O> N (54.73, 37.57, and 3.55%) respectively. Phosphorus (0.133%). The main cations K<sup>+</sup>, Ca<sup>2+</sup>, Mg<sup>+</sup>, and Na<sup>2+</sup> (0.048, 1.032, 0.094, and 1.13%). And a secondary macronutrient S (0.247%). The micronutrients and some beneficial elements Fe, Cl, Al, and

160 Si (0.163, 0.027, 0.354, 0.985%), respectively, were also analyzed. The data, also, are  
161 corroborated by the spectra obtained (**Fig. 4**).

162

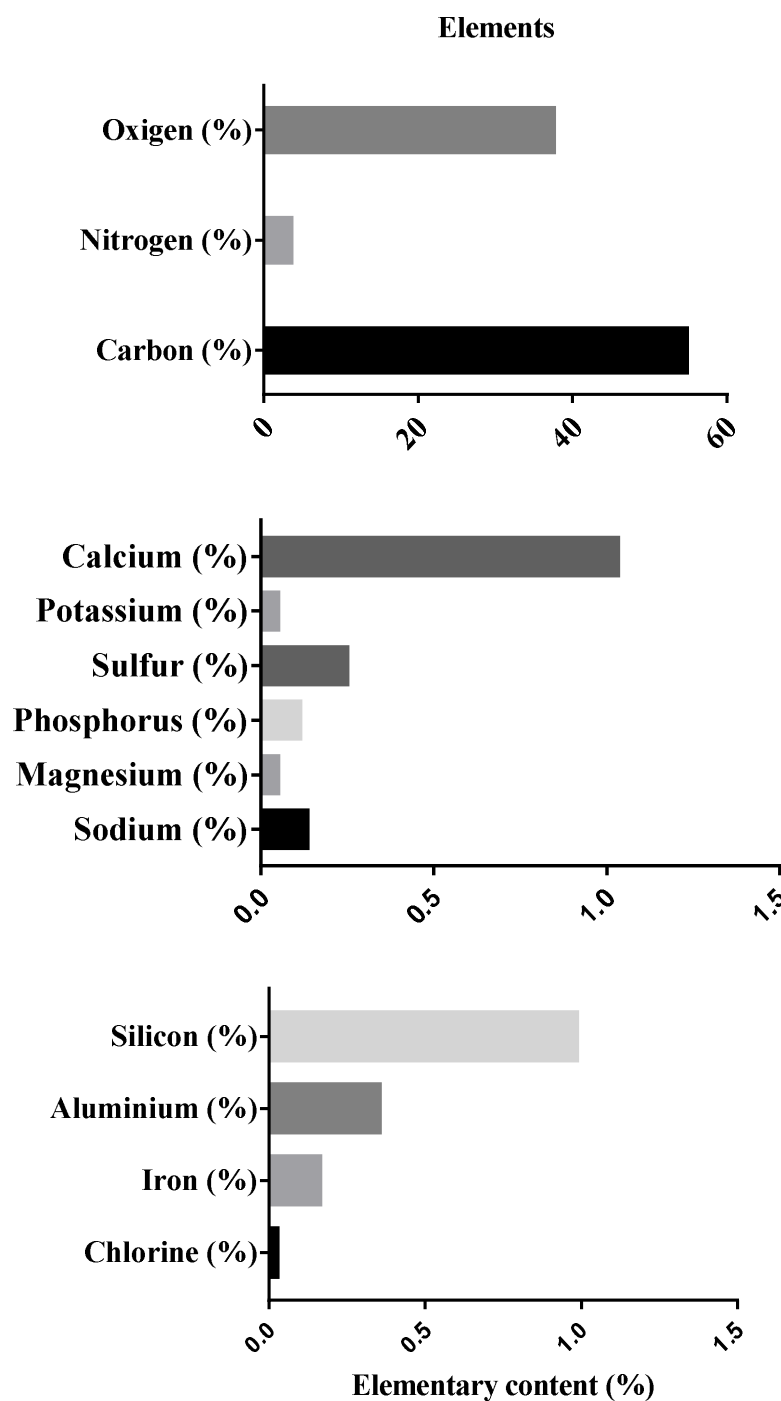

**Fig. 3.** Elementary content (%) of primary and secondary macronutrients, micronutrients, and beneficial elements on root-knot nematodes.



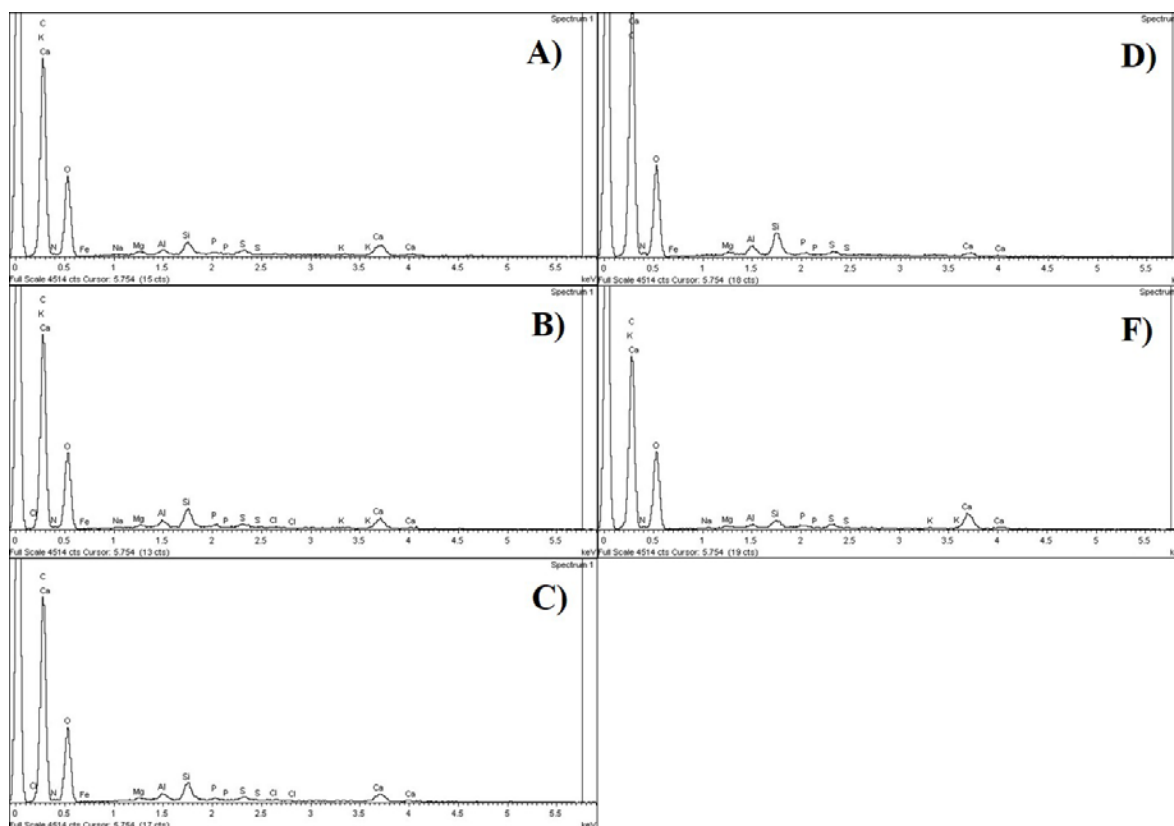

**Fig. 4.** Spectra obtained from the five replicas (A, B, C, D, E, F) on (RKN). The peaks indicate the analyzed elements.

## Nematode-gall metabolic profile LC-MS Q-TOF

The chromatograms for both polarities (ES+/ES-) can be seen in Figure 5. The sample with FAA fixative solution (red peaks), presented a greater number of compounds, with respect to the sample containing HPLC water (green peak).

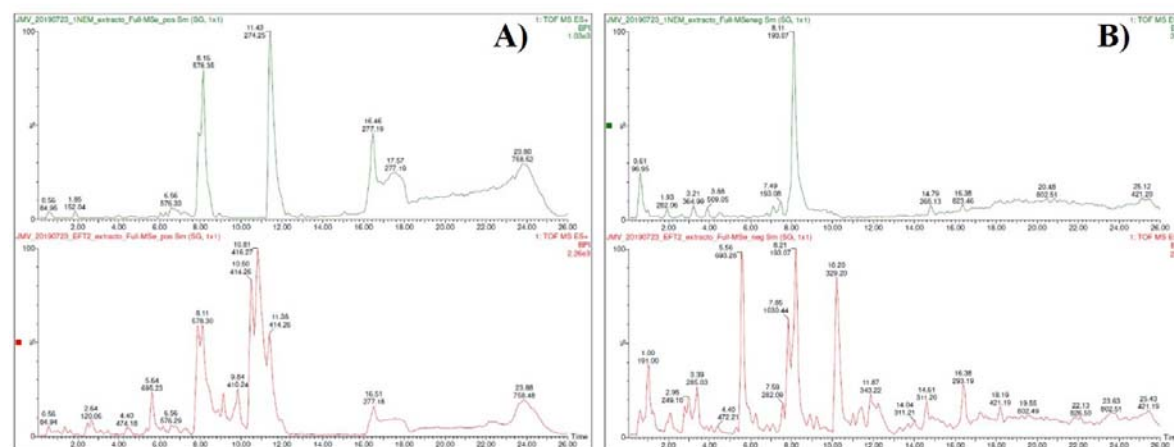

**Fig. 5.** Chromatogram of progenesis. A) Polarity (ES+), the green peaks indicate the knot sample containing HPLC water; the red peaks indicate the knot sample containing FAA fixative solution. B) Polarity (ES-), the green peaks indicate the knot sample containing HPLC water; the red peaks indicate the knot sample containing FAA fixative solution.

With mode polarity (ES+) 202 compounds were detected. Of the above 195 compounds have at least one possible identification candidate, according to the database (PlantCys: <https://www.plantcyc.org/>) and (ChEBI: <https://www.ebi.ac.uk/chebi/>). While the mode (ES-) 42 compounds were detected, where 41 of the detected compounds match at least one compound. In our investigation we present the putative compounds with the highest score (Fig. 6), these were: -Oxo-1-(3-pyridyl)-1-butanone, N-Acetyl-L-tyrosine, 4-(3,4-dihydroxyphenyl) butan-2-one, Fumecyclohex, Kukoamine B, Subaphylline, 2-[[3-[[2-(dimethylamino) phenyl]methyl]-2-pyridin-4-yl-1,3-diazinan-1-yl]methyl]-N,N-dimethylaniline, N1-trans-Feruloylagmatine, Physagulin E, Megestrol, Kukoamine C, Phytolaccoside A, L-3-nitrotyrosine, Egonol oleate, Collettiside I, Midodrine, Discodermolide, Dehydrotomatine, C1-[[[(3S,9R,10S)-16-[[anilino(oxo)methyl]amino]-12-[(2S)-1-hydroxypropan-2-yl]-3,10-dimethyl-13-oxo-2,8-dioxo-12-azabicyclo[12.4.0]octadeca-1(14),15,17-trien-9-yl]methyl]-3-cyclohexyl-1-methylure, Dehydrotomatine, Dehydrotomatine, Jurubine, Jurubine, 17beta-Methylestra-1,3,5(10)-trien-3-ol, Veraguamide G, Etnangien, 1-palmitoyl-2-hexanoyl-sn-glycero-3-phosphocholine, Etnangien, Dehydrotomatine, Avenacin B-2, Dihydromelilotoside, (23R)-Acetoxytomatine, Tomatine, Melilotussaponin O1, Minutissamide D, (23R)-Acetoxytomatine, 4-amino-3-[(cyclohexylamino)-oxomethyl]-5 isothiazolecarboxylic acid ethyl ester, Butyl oleate sulfate, 13-hydroperoxyoctadeca-9,11-dienoic acid, 2,3-bis-O-(geranylgeranyl)-sn-glycero-3-phospho-L-serine(1-), 3-[(2S,3R)-5-[(2S)-1-hydroxypropan-2-yl]-3-methyl-2-(methylaminomethyl)-6-oxo-3,4-dihydro-2H-pyrido[2,3-b][1,5]oxazocin-8-yl]-N,N-dimethylbenzamide. Some compounds were found more than twice in the same and different ranges (colored circles) (m/z) (Fig. 6). However, those compounds of greater agronomic interest were selected and for future research (Table 1), such as feruloylagmatine, dehydrotomatine, jurubine (Fig. 7), etnangien, tomatina, and minutissamides.

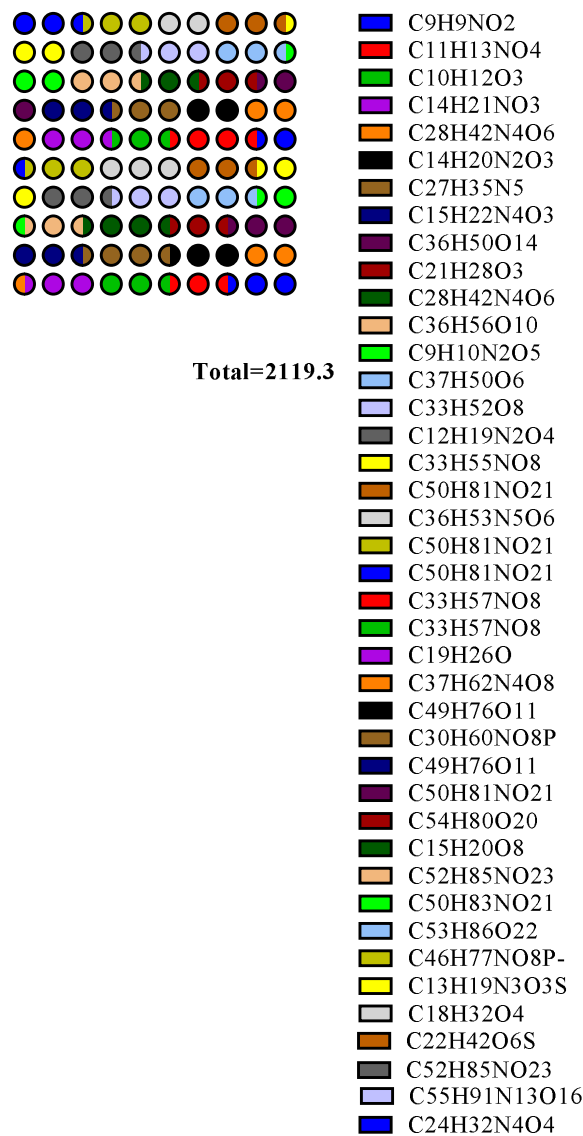

**Fig. 6.** Putative metabolic compounds with the highest score found on root-knot nematodes.

## Discussion

*Pathogenesis: Root-knot nematodes (SEM-EDS)*

Nematodes in juvenile state were observed for the first time in the micro-spaces within the gill. The wave motion is corroborated with the micrographs (Fig. 2B), described studies of wave movements in Newtonian fluids were described for *C. elegans* (Fang-Yen et al., 2010).

The individual giant cells induced by the nematodes, is the perfect microspace for their proliferation and feeding (Fig. 2C). After embryogenesis, the juvenile of the first stage (J1) moves into the egg, and passes to the infectious juvenile of the second stage (J2) that emerges from the egg (Jones et al., 2013). The damage is due to the diversion of the host's nutrients to the knot and interference with transport processes (Chin et al., 2018). Plants can recognize cell damage caused by invasion of parasitic nematodes (PPN), through recognition based on patterns located on the cell surface (PRR) of molecular patterns associated with damage (Sato et al., 2019).

#### *Elementary relative concentration on root-knot nematodes (SEM-EDS)*

The roots absorb water, mineral nutrients and anchor to the plant; outbreaks perform photosynthesis, perspiration, and are the breeding site (Groff and Kaplan, 1988). The relative elemental concentration on the gill was C>O>N (54.73, 37.57, and 3.55%) respectively. Phosphorus (0.133%). The main cations Na>Ca>Mg>K (1.13, 1.032, 0.094 and 0.048%). The S as secondary macronutrient (0.247%). The micronutrients were Fe>Cl (0.163, 0.027%), and the beneficial elements Si>Al (0.985, 0.354%) respectively. The data, also, are corroborated by graph and spectra obtained (Fig. 3, Fig. 4). C, H, and O, are the non-mineral class of macronutrients, however, plants depend on them for the construction of larger organic molecules in the cell. Macronutrients are related to cellular components, such as proteins and nucleic acids, are required in large quantities. Micronutrients are the important enzyme cofactors in plant metabolism and are required in small amounts (Morgan and Connolly, 2013). Roots >2 mm in diameter that contained significantly more N, P, and Mg and less C were analyzed, the concentrations for N and P were 11.0 and 0.9 g·kg respectively, more than the 5 mm roots of coniferous trees and broad leaf (Gordon and

([Jackson, 2000](#)). This indicates that the distribution of minerals in the different organs of the plant may vary over time ([Juárez-Maldonado et al., 2017](#)).

#### *Metabolic signal transduction on (RKN)*

Feeding sites serve as nutrient stores for nematodes, but it is in stark contrast, with the mutual benefits derived from microbes, such as plants during mycorrhizal root colonization ([Davis and Mitchum, 2005](#)). Genes encoding secreted chorismate mutase (CM) have been isolated from root-knot and soybean cyst nematodes ([Doyle and Lambert, 2003](#)). CM is a pivotal enzyme in the shikimic acid pathway that modulates synthesis of Phe and Try, having pleiotropic effects on cellular metabolism, auxin synthesis, and as precursors of plant defense compounds ([Davis and Mitchum, 2005](#)). In this first metabolomic profile, kukoamine (KB, C<sub>28</sub>H<sub>42</sub>N<sub>4</sub>O<sub>6</sub>) ([Table 1](#)) was detected, a natural alkaloid with high affinity for bacterial lipopolysaccharide DNA (PLS) and oligodeoxynucleotides containing CpG motifs ([Liu et al., 2011](#)). The metabolic profile detected fungicidal molecules such as fumecyclohex C<sub>14</sub>H<sub>21</sub>NO<sub>3</sub> possibly for root rot control ([Kataria and Verma, 1993](#)). The soluble conjugated polyamide feruloylputrescin (C<sub>14</sub>H<sub>20</sub>N<sub>2</sub>O<sub>3</sub>) is reported for the first time ([Tang and Newton, 2005](#)) ([Table 1, Fig. 7](#)). The above polyamide may be related to colonization of arbuscular mycorrhizal fungi on (RKN). This accumulation of metabolites can be induced by fungi such as *Glomus intraradices* ([Peipp et al., 1997](#)). In addition, this polyamide has a critical role in response to abiotic stress and defense system against pathogens ([Pihlava, 2014](#)).

**Table 1.** Compounds of interest found on (RKN) and their possible role on the root-plant system

| Molecular Formula | Fragmentation score | Mass Error (ppm) | Role of the metabolite in the root-plant | m/z |
|-------------------|---------------------|------------------|------------------------------------------|-----|
|-------------------|---------------------|------------------|------------------------------------------|-----|

|                            |      |       |                                                                                                                                                                                         |         |
|----------------------------|------|-------|-----------------------------------------------------------------------------------------------------------------------------------------------------------------------------------------|---------|
| $C_{28}H_{42}N_4O_6$       | 96.1 | 1.530 | It inhibits the transduction of proinflammatory signals and the expression of cytokinins induced by LPS and CpG DNA. These are two molecular patterns associated with pathogens (PAMP). | 531.31  |
| $C_{14}H_{20}N_2O_3$       | 95   | 2.479 | Effector of the root system of plants, influences the development of the root system and nutrient collection                                                                            | 529.30  |
| $C_{15}H_{22}N_4O_3$       | 88.3 | 1.364 | Vegetable-alkaloid metabolite, role as antifungal agent, topoisomerase DNA inhibitor. It is found in cereals and cereal products.                                                       | 307.17  |
| $C_{14}H_{21}NO_3$         | 95   | 2.479 | Fungicide (furamide) microbial agent that destroys fungi by suppressing its ability to grow or reproduce                                                                                | 293.18  |
| $C_{28}H_{42}N_4O_6$       | 97.2 | 1.691 | Organic compounds (catechols)                                                                                                                                                           | 531.31  |
| $C_{50}H_{81}NO_{21}$      | 90.8 | 1.380 | <i>Lycopersicon esculentum</i> alkaloid (steroid saponins)                                                                                                                              | 1032.39 |
| $C_{50}H_{81}NO_{21}$      | 79.9 | 0.573 | <i>Lycopersicon esculentum</i> alkaloid (steroid saponins)                                                                                                                              | 1032.53 |
| $C_{50}H_{81}NO_{21}$      | 72.2 | 1.188 | <i>Lycopersicon esculentum</i> alkaloid (steroid saponins)                                                                                                                              | 527.76  |
| $C_{33}H_{57}NO_8$         | 87.8 | 4.682 | It is an alkaloid that is mainly found in the fruits of <i>Solanum torvum</i> (Steroid Saponins)                                                                                        | 578.40  |
| $C_{33}H_{57}NO_8$         | 88.1 | 9.212 | It is an alkaloid that is mainly found in the fruits of <i>Solanum torvum</i> (Steroid Saponins)                                                                                        | 618.40  |
| $C_{49}H_{76}O_{11}$       |      |       | Macrolide antibiotic                                                                                                                                                                    |         |
| $C_{50}H_{81}NO_{21}$      | 80.1 | 3.591 | <i>Lycopersicon esculentum</i> alkaloid (steroid saponins)                                                                                                                              | 1030.51 |
| $C_{15}H_{20}O_8$          | 24.1 | 3.116 | Organic compounds (phenolic glycosides). Phenolic structures include lignans and flavonoids.                                                                                            | 655.22  |
| $C_{52}H_{85}NO_{23}$      | 78.9 | 1.712 | <i>Lycoperside C</i> is a <i>Lycopersicon esculentum</i> alkaloid. They are organic compounds known as steroid saponins.                                                                | 1090.54 |
| $C_{50}H_{83}NO_{21}$      | 90.8 | 3.142 | Glucoalkaloid (tomatidine) has a role as a fungal and antimicrobial immune adjuvant. It is found in tomato leaves.                                                                      | 1078.54 |
| $C_{55}H_{91}N_{13}O_{16}$ | 93.5 | 0.446 | Organic compounds triterpenic saponins. They are glycosylated derivatives of triterpenic sapogenins                                                                                     | 1095.53 |

273

274 Feruloylagmatine  $C_{15}H_{22}N_4O_3$  is an alkaloid (Table 1, Fig. 7) of the guanidine type  
 275 belonging to the Papaveraceae family (Cheng *et al.*, 2008). This compound seems to inhibit  
 276 the germination of *Fusarium pseudograminearum* spores, but they have no effect on  
 277 mycelial growth in the *Brachypodium distachyon* Bdact2a mutant (Carere *et al.*, 2018). Its  
 278 biosynthesis is higher in roots than in barley sprouts, this pattern could be used to regulate  
 279 antifungal properties (Gorzolka *et al.*, 2014). Tomato plants synthesize glycoalkaloid  
 280 dehydrotomatine ( $C_{50}H_{81}NO_{21}$ ) and alpha-tomatine, these glycoalkaloids possibly act as a  
 281 defense with bacteria, fungi, viruses and insects, and have been found at different stages of  
 282 maturity, calyces, flowers, leaves, roots and stems (Kozukue *et al.*, 2004). Toxic  
 283 compounds of dehydrotomatine in foliage and immature fruits prevent diseases in plants  
 284 (Cataldi *et al.*, 2005). Potatoes, too, produce these glycoalkaloids and biologically active  
 285 metabolites that have specific roles in plants and the human diet (Friedman, 2006). This  
 286 bioactivity of glycoalkaloids in the genus *Solanum*, include its anticancer, anticholesterol,  
 287 antimicrobial, anti-inflammatory, antinociceptive, and antipyretic effect (Milner *et al.*,  
 288 2011). We report for the first time the jurubine compound ( $C_{33}H_{57}NO_8$ ) (Table 1, Fig. 7) in  
 289 the metabolic profile of the nematode knot, an alkaloid with antioxidant properties, and has  
 290 been reported in *Solanum torvum* (Innih *et al.*, 2018). It is known that the genus *Solanum*  
 291 synthesize this compound in leaves, roots and fruits (Scheiber and Ripberger, 1996). We  
 292 report for the first time a novel natural macrolide antibiotic called etnangien ( $C_{49}H_{76}O_{11}$ )  
 293 (Table 1), the fact is that it is a potent structurally unique RNA polymerase inhibitor  
 294 analogue of myxobacteria (*Sorangium cellulosum*) (Menche *et al.*, 2008). This gram-  
 295 negative bacterium secretes hydrolytic enzymes that break down organic matter (OM) and  
 296 other living organisms in its environment, in addition, they form latent fruiting bodies that  
 297 resist environmental stresses (Julien and Fehd, 2003). These findings demonstrate the  
 298 relationship between the nematode- knot -nutrients- and possible myxobacteria in tomato  
 299 roots.

300 We report, to the compound dihydromelilotosida  $C_{15}H_{20}O_8$  (Table 1), this metabolite has  
 301 been observed in Dendrobium, a compound with antioxidant potential (Yang *et al.*, 2007;  
 302 Gutiérrez, 2010), 56 compounds have been reported in the flower structure of the



*Cymbidium* orchid with different functionalities (García-Gaytán et al., 2013). Tomatine ( $C_{50}H_{83}NO_{21}$ ), like dehydrotomatin, is stereroid glycoalkaloids (SGA), and is located in immature leaves and fruits of tomatoes, it is possible that this alkaloid protects the fruits while they ripen (Caballero et al., 2003; Cárdenas et al., 2016). In the metabolomic profile we find the compound minutissamides ( $C_{55}H_{91}N_{13}O_{16}$ ) (Table 1), a cyclic polypeptide that possess cytotoxic activity (Mareš et al., 2019). Four A-D minutissamide of the *Anabaena minutissima* cyanobacterium (UTEX 1613) have been isolated (Kang et al., 2011). Facing the challenges of water resources in the world, he has investigated cyanobacteria, they have the biological potential for wastewater treatment, there is a 70% reduction in calcium, 46% chloride, 100% nitrate, 88% nitrite, 100% ammonia, 92 % total phosphorus, 12.5% magnesium in different wastewater treated with different species of cyanobacteria (Dash et al., 2019). Cyanobacteria have the ability to switch to myxotrophic nutrition, they can metabolize organic pollutants, breaking them down into less toxic or non-toxic substances (bio-remediation), while in the purification of wastewater it is based on their ability to use ammonium ions as nitrogen source (Zinicovscaia and Cepoi, 2016).

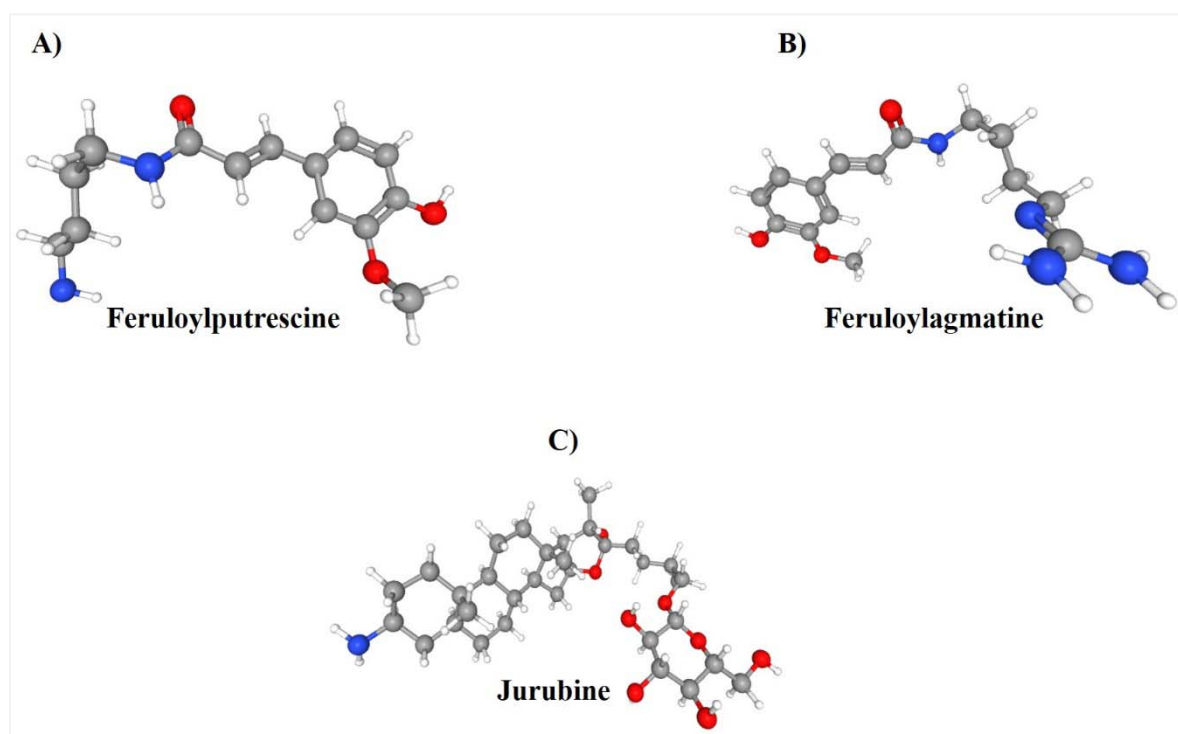



**Fig. 7.** Compounds of great agronomic interest on root-knot nematodes. A) Feruloylputrescina soluble conjugated polyamide ( $C_{14}H_{20}N_2O_3$ ) is related to the colonization of arbuscular micro-fungal fungi over knot, can be induced by intra-radic *Glomus* and which can have a positive response to biotic and abiotic stress. B) Feruloylagmatine  $C_{15}H_{22}N_4O_3$  is an alkaloid that inhibits the germination of spores of *Fusarium pseudograminearum*. B) The jurubine ( $C_{33}H_{57}NO_8$ ) is an alkaloid with antioxidant properties, and has been reported in *Solanum torvum* and is synthesized in leaves, roots and fruits.

## Conclusion

Root-knot nematodes are parasites that destroy many crops globally. We adopt for the first time, the term of micro-space of the nematode within the knot. In all cases the nematodes were found in infectious juvenile state (J2), with wave motion. The presence of  $Na^+$  on root-knot nematodes affected the concentration of  $Mg^{2+}$  and  $K^+$ , while the relative concentration of N was higher. Possibly this response is due to the type of fertilizer used and/or nutrient solution. Tuna et al. (2007) found that the Ca/Na and K/Na ratio can be affected in tomato leaves, due to a higher concentration of NaCl in the root, and the concentration of N is not affected. The most relevant compounds for future research are kokoamine, furmecyclox, feruloylputrescina, feruloylagmatina, dehydrotomatina, jurubine, etnangien, dehydromelilotoside, tomatina and minutissamides. It is suggested that an integrated management and control over root-knot nematodes, should be carried out, laboratory analysis of soil, and water. The application of composts and vermicomposts on planting beds, mineral fertilizers, control of the nutrient solution (EC, pH), foliar applications of biostimulants, monitoring of relative humidity (RH) and temperature for pest control/diseases.

## Supplementary data

Supplementary data are available at JXB online

**Figure S1.** Tomato root nematodes seen from the stereoscope microscope

348

## 349 Acknowledgments

350 To Dr. Emanuel Bojórquez-Quintal (Professor-CONACTY) for the conservation and  
351 treatment of the sample. Mr. Esteban Sánchez-Rodríguez (Colmich-LADIPA) for taking  
352 the micrographs and determining the elementary content on (RKN). Dr. José J. Ordaz-Ortiz  
353 and Mr. Josaphat M. Montero Vargas (Lab metabolomics: Metabolomics and mass  
354 spectrometry, Cinvestav-Langebio) for the methodology, elaboration of the analysis and  
355 results of the metabolomic profile on (RKN). Olimpia Alonso-Pérez analyst (Colmich-  
356 LADIPA). Analyst Luis M. Rojas-Abarca (Colmich-LADIPA). Students Elena Gómez-  
357 Cabrera and Juan L. Negrete-Guerrero (UPP) for their support, and Dr. Víctor García-  
358 Gaytán idea, writing, statistical analysis, interpretation, revision, and corrections of the  
359 manuscript (Research Professor, El Colegio de Michoacán, AC).

360

## References

**Ben-Hayyim G, Damon JP, Martin-Tanguy J, Tepfer D.** 1994. Changing root system architecture through inhibition of putrescine and feruloyl putrescine accumulation. *FEBS letters* **342**, 145-148.

**Caballero B, Trugo LC, Finglas PM.** 2003. Encyclopedia of food sciences and nutrition. Academic.

**Cárdenas PD, Sonawane PD, Pollier J, Bossche RV, Dewangan V, Weithorn E, Giri AP.** 2016. GAME9 regulates the biosynthesis of steroidal alkaloids and upstream isoprenoids in the plant mevalonate pathway. *Nature communications* **7**, 10654.

**Carere J, Powell J, Fitzgerald T, Kazan K, Gardiner DM.** 2018. BdACT2a encodes an agmatine coumaroyl transferase required for pathogen defence in *Brachypodium distachyon*. *Physiological and Molecular Plant Pathology* **104**, 69-76.

**Cataldi TR, Lelario F, Bufo SA.** 2005. Analysis of tomato glycoalkaloids by liquid chromatography coupled with electrospray ionization tandem mass spectrometry. *Rapid Communications in Mass Spectrometry: An International Journal Devoted to the Rapid Dissemination of Up-to-the-Minute Research in Mass Spectrometry* **19**, 3103-3110.

**Cheng X, Wang D, Jiang L, Yang, D.** 2008. DNA topoisomerase I inhibitory alkaloids from *Corydalis saxicola*. *Chemistry & biodiversity* **5**, 1335-1344.

**Chin S, Behm CA, Mathesius U.** 2018. Functions of flavonoids in plant–nematode interactions *Plants* **7**, 85.

**Dash AK, Das M, Pradhan A.** 2019. Cyanobacteria in Reducing Pollution Load from Wastewater and Laboratory Bioassay of Heavy Metals on Ecotoxicity Study: A Review. In: The Role of Microalgae in Wastewater Treatment. Singapore: Springer, 65-87.

**Davis EL, Mitchum MG.** 2005. Nematodes. Sophisticated parasites of legumes. Plant Physiology **137**, 1182.

**Doyle EA, Lambert KN.** 2003. Meloidogyne javanica chorismate mutase 1 alters plant cell development. Molecular Plant-Microbe Interactions **16**, 123-131.

**Eisenhauer N, Lanoue A, Strecker T, Scheu S, Steinauer K, Thakur MP, Mommer L.** 2017. Root biomass and exudates link plant diversity with soil bacterial and fungal biomass. Scientific reports **7**, 44641.

**Fang-Yen C, Wyart M, Xie J, Kawai R, Kodger T, Chen S, Samuel AD.** 2010. Biomechanical analysis of gait adaptation in the nematode *Caenorhabditis elegans*. Proceedings of the National Academy of Sciences **107**, 20323-20328.

**Friedman M.** 2006. Potato glycoalkaloids and metabolites: roles in the plant and in the diet. Journal of Agricultural and Food Chemistry **54**, 8655-8681.

**García-Gaytán V, Bojórquez-Quintal E, Hernández-Mendoza F, Tiwari DK, Corona-Morales N, Moradi-Shakoorian Z.** 2019. Polymerized Silicon (SiO<sub>2</sub>·nH<sub>2</sub>O) in *Equisetum arvense*: Potential Nanoparticle in Crops. Journal Chilean Chemical Society **64**, 4298-4302.

**García-Gaytán V, García-Morales S, Silva-Rojas HV, Trejo-Téllez LI, Gómez-Merino FC.** 2016. First report of powdery mildew in chilhuacle chili (*Capsicum annuum*) caused by *Leveillula taurica* in Southern Mexico. Plant Disease **100**, 2325-2325.

**García-Gaytán V, Gómez-Merino FC, Trejo-Téllez LI, Baca-Castillo GA, García-Morales S.** 2017. The chilhuacle chili (*Capsicum annuum* L.) in Mexico: Description of the variety, its cultivation, and uses. International Journal of Agronomy, 2017.

**García-Gaytán V, Hernández-Mendoza F, Coria-Téllez AV, García-Morales S, Sánchez-Rodríguez E, Rojas-Abarca L, Daneshvar H.** 2018. Fertigation: Nutrition, Stimulation and Bioprotection of the Root in High Performance Plants **7**, 88.

**García-Gaytán V, Trejo-Téllez LI, Gómez-Merino FC, García-Morales S, Tejeda-Sartorius O, Ramírez-Martínez M, Delgadillo-Martínez J.** 2018. Gamma radiation and osmotic potential of the nutrient solution differentially affect macronutrient concentrations, pH and EC in chilhuacle pepper fruits. Journal of Radioanalytical and Nuclear Chemistry **315**, 145-156.

**García-Gaytán V, Valdovinos-Ponce G, Rodríguez-Mendoza MDLN, Pedraza-Santos ME, Trejo-Telléz LI, Soto-Hernández M.** 2013. Rutas de la penetración foliar en la fertilización de la orquídea *Cymbidium* sp. (Orchidaceae). Revista mexicana de ciencias agrícolas **4**, 913-924.

**Gaytán VG, Mendoza MDLNR, Hernández MS, Trejo-Téllez LI, Santos MEP, Ponce GV.** 2013. Volatile components in the flower, pedicellate ovary and aqueous residue of *Cymbidium* sp.(ORCHIDACEAE). *Journal of Analytical Sciences, Methods and Instrumentation* **3**, 212.

**Ghorbani R, Wilcockson S, Koocheki A, Leifert C.** 2009. Soil management for sustainable crop disease control: a review. In: *Organic farming, pest control and remediation of soil pollutants*. Dordrecht: Springer, 177-201.

**Gordon WS, Jackson RB.** 2000. Nutrient concentrations in fine roots. *Ecology* **81**, 275-280.

**Gorzolka K, Bednarz H, Niehaus K.** 2014. Detection and localization of novel hordatine-like compounds and glycosylated derivatives of hordatines by imaging mass spectrometry of barley seeds. *Planta* **239**, 1321-1335.

**Grandillo S, Zamir D, Tanksley SD.** 1999. Genetic improvement of processing tomatoes: A 20 years perspective. *Euphytica* **110**, 85-97.

**Groff PA, Kaplan DR.** 1988. The relation of root systems to shoot systems in vascular plants. *The Botanical Review* **54**, 387-422.

**Gutiérrez RMP.** 2010. Orchids: A review of uses in traditional medicine, its phytochemistry and pharmacology. *Journal of Medicinal Plants Research* **4**, 592-638.

**Hadar Y, Papadopoulou KK.** 2012. Suppressive composts: microbial ecology links between abiotic environments and healthy plants. *Annual review of phytopathology* **50**, 133-153.

**Hassan MA, Pham TH, Shi H, Zheng J.** 2013. Nematodes threats to global food security. *Acta Agriculturae Scandinavica, Section B–Soil & Plant Science* **63**, 420-425.

**Hoth S, Stadler R, Sauer N, Hammes UZ.** 2008. Differential vascularization of nematode-induced feeding sites. *Proceedings of the National Academy of Sciences* **105**, 12617-12622.

**Innih SO, Agu KC, Eze GI.** 2018. Immunomodulatory and hepatoprotective properties of *Solanum torvum* (Turkey berry). *Sahel Medical Journal* **21**, 13.

**Jones JT, Haegeman A, Danchin EG, Gaur HS, Helder J, Jones MG, Perry RN.** 2013. Top 10 plant-parasitic nematodes in molecular plant pathology. *Molecular plant pathology* **14**, 946-961.

**Juárez-Maldonado A, de-Alba-Romenus K, Morales-Díaz AB, Benavides-Mendoza A.** 2017. Macro-nutrient uptake dynamics in greenhouse tomato crop. *Journal of Plant Nutrition* **40**, 1908-1919.

- Julien B, Fehd R.** 2003. Development of a mariner-based transposon for use in *Sorangium cellulosum*. *Applied and Environmental Microbiology* **69**, 6299-6301.
- Kang HS, Kronic A, Shen Q, Swanson SM, Orjala, J.** 2011. Minutissamides A–D, antiproliferative cyclic decapeptides from the cultured cyanobacterium *Anabaena minutissima*. *Journal of natural products* **74**, 1597-1605.
- Kataria HR., Verma, PR.** 1993. Interactions of fungicide and insecticide combinations against *Rhizoctonia* damping-off and root rot in canola. *Annals of applied biology* **123**, 233-246.
- Kozukue N, Han JS, Lee KR, Friedman M.** 2004. Dehydrotomatine and  $\alpha$ -tomatine content in tomato fruits and vegetative plant tissues. *Journal of Agricultural and Food Chemistry* **52**, 2079-2083.
- Larkin RP, Griffin TS, Honeycutt CW.** 2010. Rotation and cover crop effects on soilborne potato diseases, tuber yield, and soil microbial communities. *Plant Disease* **94**, 1491-1502.
- Liu X, Zheng X, Wang N, et al.** 2011. Kukoamine B, a novel dual inhibitor of LPS and CpG DNA, is a potential candidate for sepsis treatment. *British Journal of Pharmacology* **162**, 1274-1290.
- Mareš J, Hájek J, Urajová P, Kust A, Jokela J, Saurav K, Permi P.** 2019. Alternative biosynthetic starter units enhance the structural diversity of cyanobacterial lipopeptides. *Applied and Environmental Microbiology* **85**, e02675-18.
- Menche D, Arian F, Perlova O, Horstmann N, Ahlbrecht W, Wenzel SC, Müller R.** 2008. Stereochemical determination and complex biosynthetic assembly of etnangien, a highly potent RNA polymerase inhibitor from the myxobacterium *Sorangium cellulosum*. *Journal of the American Chemical Society* **130**, 14234-14243.
- Milner SE, Brunton NP, Jones PW, O'Brien NM, Collins SG, Maguire AR.** 2011. Bioactivities of glycoalkaloids and their aglycones from *Solanum* species. *Journal of agricultural and food chemistry* **59**, 3454-3484.
- Morgan JB, Connolly EL.** 2013. Plant-soil interactions: nutrient uptake. *Nature Education Knowledge* **4**, 2.
- Niu X, Zhai P, Zhang W, Gu Y.** 2019. Effects of Earthworms and Agricultural Plant Species on the Soil Nematode Community in a Microcosm Experiment. *Scientific reports* **9**, 1-11.
- Peipp H, Maier W, Schmidt J, Wray V, Strack D.** 1997. Arbuscular mycorrhizal fungus-induced changes in the accumulation of secondary compounds in barley roots. *Phytochemistry* **44**, 581-587.

**Pihlava JM.** 2014. Identification of hordatines and other phenolamides in barley (*Hordeum vulgare*) and beer by UPLC-QTOF-MS. Journal of cereal science **60**, 645-652.

**Ritz K, Trudgill DL.** 1999. Utility of nematode community analysis as an integrated measure of the functional state of soils: perspectives and challenges. Plant and soil **212**, 1-11.

**Sato K, Kadota Y, Shirasu K.** 2019. Plant immune responses to plant parasitic nematodes. Frontiers in Plant Science **10**, 1165.

**Schreiber K, Ripperger H.** 1966. Jurine, a novel type of steroidal saponin with (25S)-3 $\beta$ -amino-5 $\alpha$ -furostane-22 $\alpha$ . 26-diol O (26)- $\beta$ -D-glucopyranoside structure from *solanum paniculatum* L. Tetrahedron Letters **7**, 5997-6002.

**Tang W, Newton RJ.** 2005. Polyamines promote root elongation and growth by increasing root cell division in regenerated Virginia pine (*Pinus virginiana* Mill.) plantlets. Plant cell reports **24**, 581-589.

**Tuna AL, Kaya C, Ashraf M, Altunlu H, Yokas I, Yagmur B.** 2007. The effects of calcium sulphate on growth, membrane stability and nutrient uptake of tomato plants grown under salt stress. Environmental and Experimental Botany **59**, 173-178.

**van Dam NM, Bouwmeester HJ.** 2016. Metabolomics in the rhizosphere: tapping into belowground chemical communication. Trends in plant science **21**, 256-265.

**Yang L, Nakamura N, Hattori M, Wang Z, Bligh SA, Xu L.** 2007. High performance liquid chromatography-diode array detection/electrospray ionization mass spectrometry for the simultaneous analysis of cis-, trans- and dihydro-2-glucosyloxycinnamic acid derivatives from *Dendrobium* medicinal plants. Rapid Communications in Mass Spectrometry: An International Journal Devoted to the Rapid Dissemination of Up-to-the-Minute Research in Mass Spectrometry **21**, 1833-1840.

**Zinicovscaia I, Cepoi L.** 2016. Cyanobacteria for bioremediation of wastewaters. Chapter 1. Springer International Publishing Switzerland, 1-3.



**Fig. 2.**

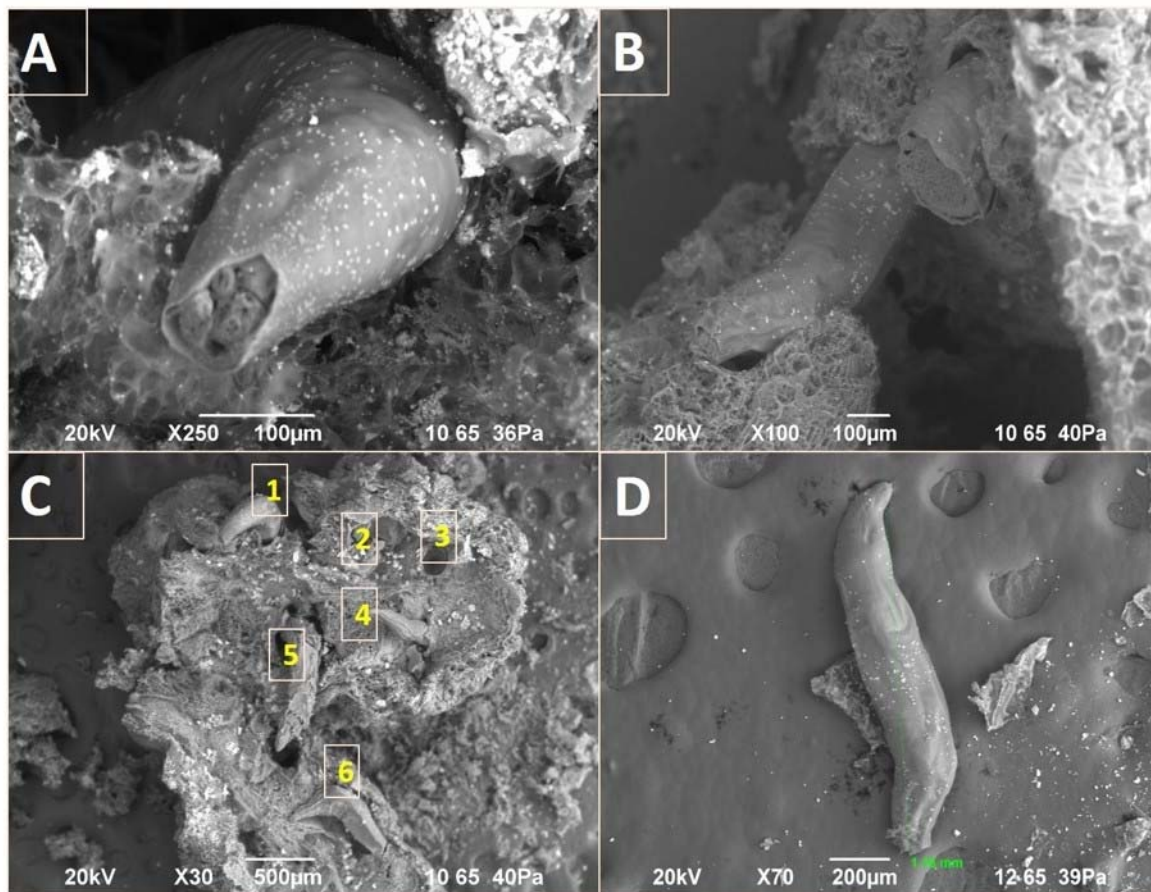

**Fig. 2.** Root-knot nematodes, a) juvenile state of the nematode within the gill, wave motion within the micro-space, b) wave-like locomotion of the nematode within the micro-space of the gill, c) population of juvenile nematodes within of the knot (micro-space), d) length of a male nematode.

**Fig. 3.**

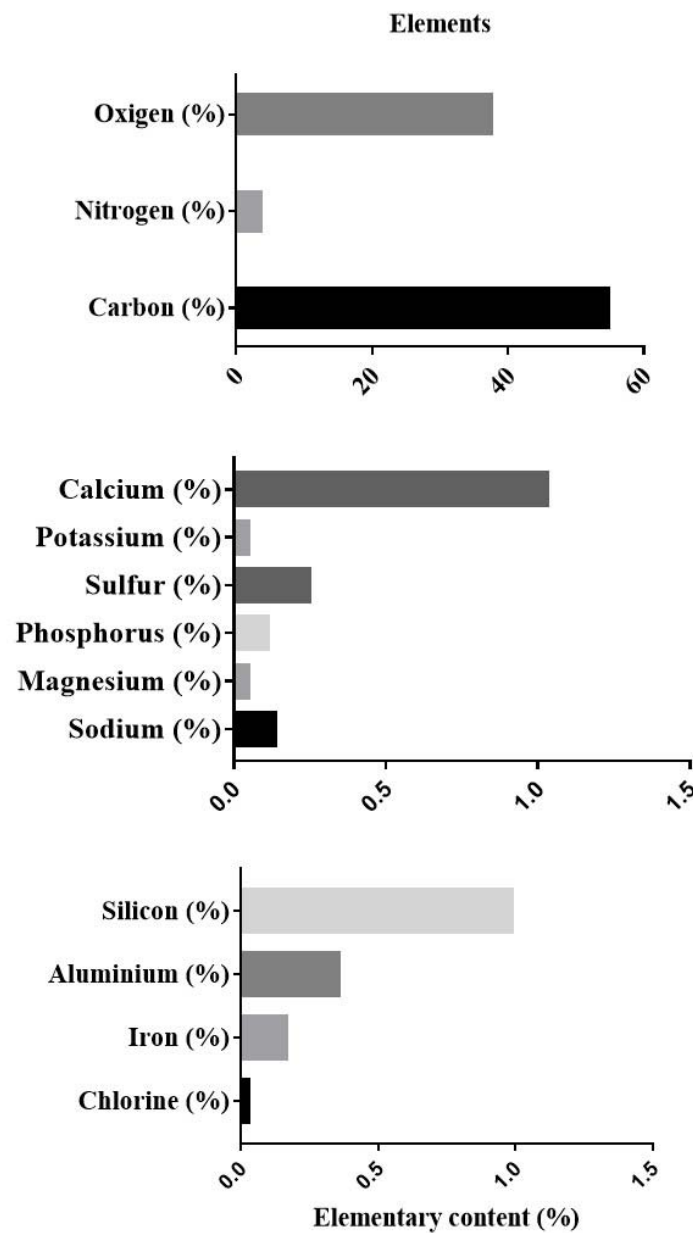

**Fig. 3.** Elementary content (%) of primary and secondary macronutrients, micronutrients, and beneficial elements on root-knot nematodes.



**Fig. 4.**

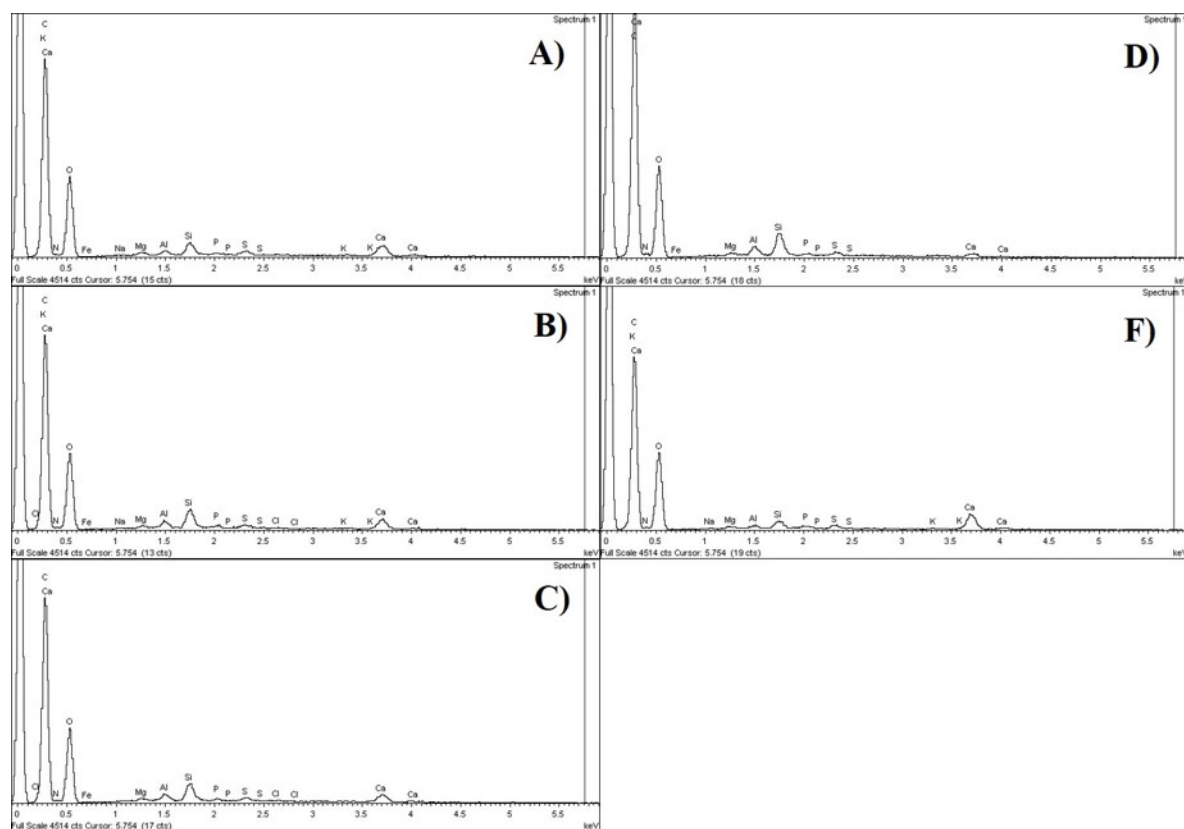

**Fig. 4.** Spectra obtained from the five replicas (A, B, C, D, E, F) on (RKN). The peaks indicate the analyzed elements.



**Fig. 6. RGB**

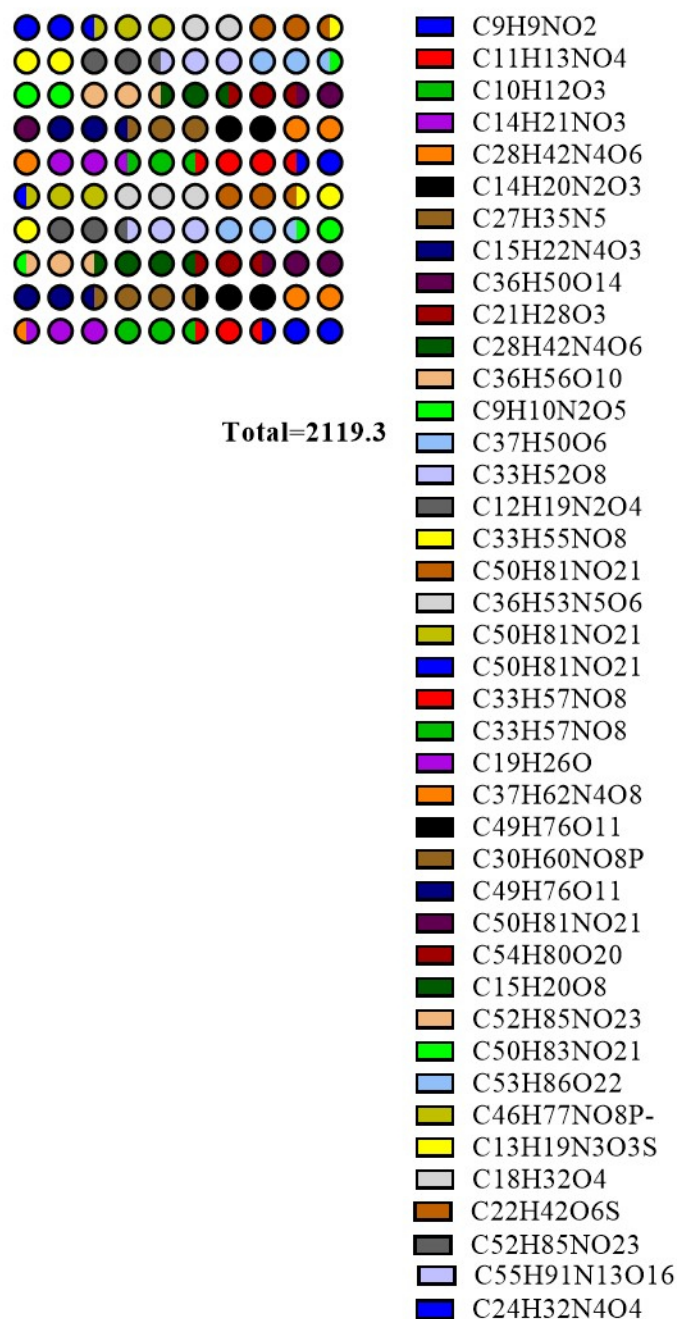

**Fig. 6.** Putative metabolic compounds with the highest score found on root-knot nematodes.

**Fig. 7. RGB**

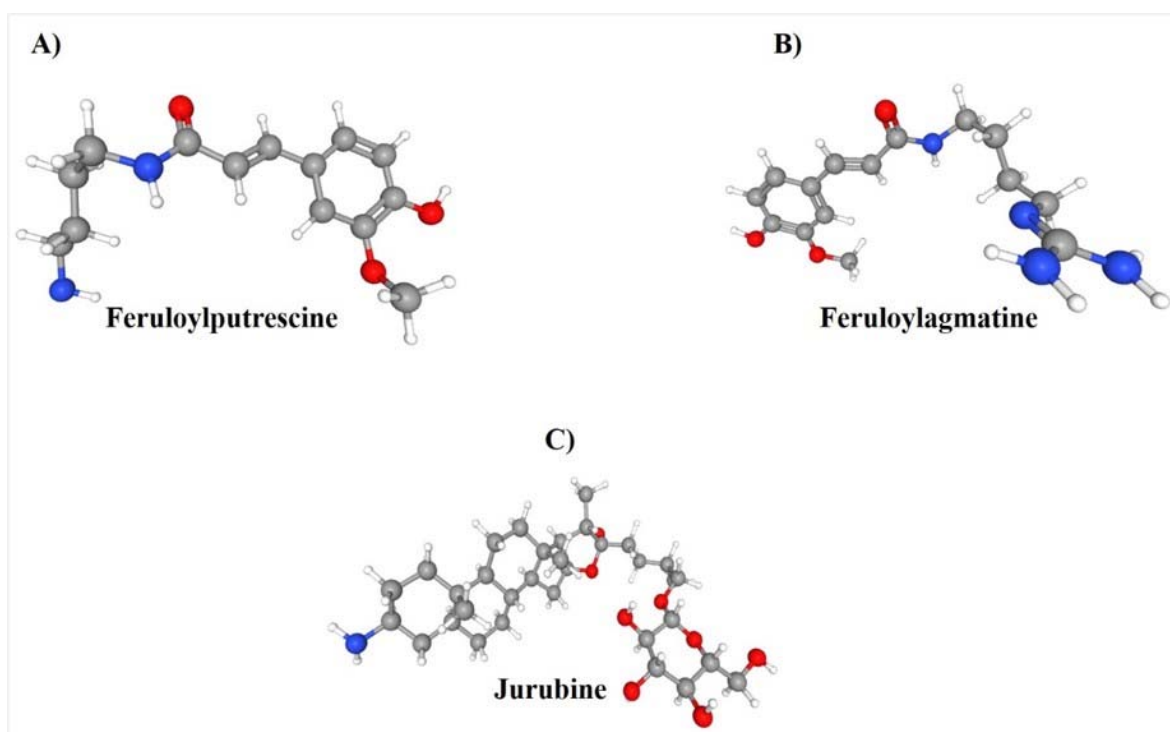

**Fig. 7.** Compounds of great agronomic interest on root-knot nematodes. A) Feruloylputrescine soluble conjugated polyamide ( $C_{14}H_{20}N_2O_3$ ) is related to the colonization of arbuscular mycorrhizal fungi on the knot, it can be induced by intraradic *Glomus* and it can have a positive response to biotic and abiotic stress. B) Feruloylagmatine  $C_{15}H_{22}N_4O_3$  is an alkaloid that inhibits the germination of spores of *Fusarium pseudograminearum*. B) The jurubine ( $C_{33}H_{57}NO_8$ ) is an alkaloid with antioxidant properties, and has been reported in *Solanum torvum* and is synthesized in leaves, roots and fruits.
